# Supplementary material
Source: Royal Society of Chemistry journal article supplement (doi:10.1039/d6dt00250a)
Supplement: d6dt00250a1.pdf [file d6dt00250a1.pdf]

## Electronic Supplementary Information

### **Solution-Processed $Zn_xCd_{1-x}S$ Electron Transport Layer for High-Performance Inverted Quantum Dot Light-Emitting Diodes**

Yuanlin Huang, Chen Lin, Mengxin Liu\*, Xinan Shi\* and Daocheng Pan\*

State Key Laboratory of Featured Metal Materials and Life-cycle Safety for Composite Structures; Guangxi Key Laboratory of Processing for Non-ferrous Metals and Featured Materials; Guangxi Key Laboratory of Advanced Rare Earth Materials; School of Resources, Environment and Materials, Guangxi University, Nanning 530004, China

\*E-mail: mxliu@st.gxu.edu.cn; xashi@gxu.edu.cn and dcpan@gxu.edu.cn

**Table S1** Device parameters of QLED devices with different ETLs.

| <b>ETL</b>                            | <b>V<sub>on</sub> (V)</b> | <b>L<sub>max</sub> (cd m<sup>-2</sup>)</b> | <b>EQE (%)</b> | <b>Reference</b> |
|---------------------------------------|---------------------------|--------------------------------------------|----------------|------------------|
| ZnO                                   | 2.4                       | 68811                                      | 20.7           | 1                |
| ZnMgO                                 | 2.3                       | 200000                                     | 22.3           | 2                |
| SnO <sub>2</sub>                      | 2.5                       | 60833                                      | 18.9           | 3                |
| TiO <sub>2</sub>                      | 3.0                       | 106789                                     | 12.0           | 4                |
| CdS                                   | 3.0                       | 90250                                      | 10.9           | This work        |
| Zn <sub>0.1</sub> Cd <sub>0.9</sub> S | 3.0                       | 103910                                     | 16.0           | This work        |

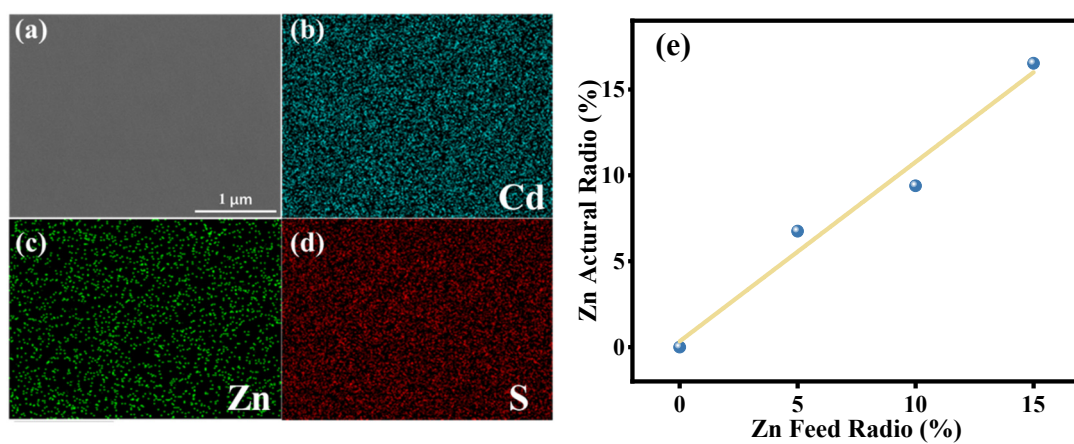

**Fig. S1** (a) SEM surface morphology and (b-d) elemental mappings of Zn<sub>0.1</sub>Cd<sub>0.9</sub>S thin film. (e) Relationship between actual Zn<sup>2+</sup> doping ratios and Zn<sup>2+</sup> feeding ratios in Zn<sub>x</sub>Cd<sub>1-x</sub>S thin films.

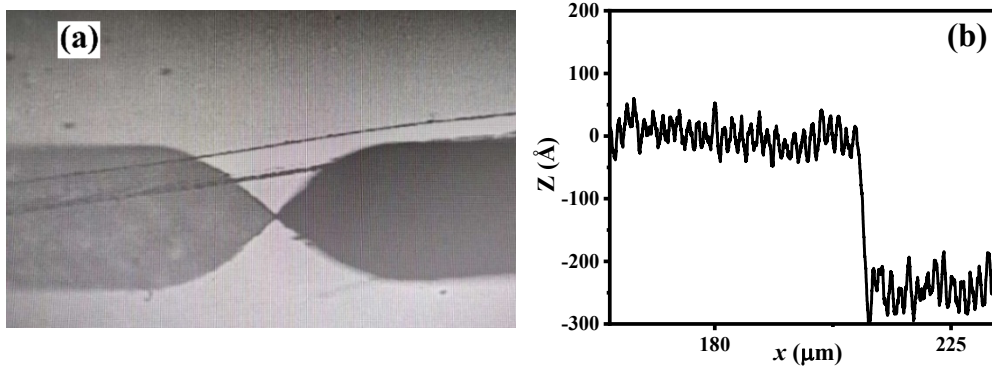

**Fig. S2** (a) Surface morphology and (b) step height profile of Zn<sub>0.1</sub>Cd<sub>0.9</sub>S thin film.

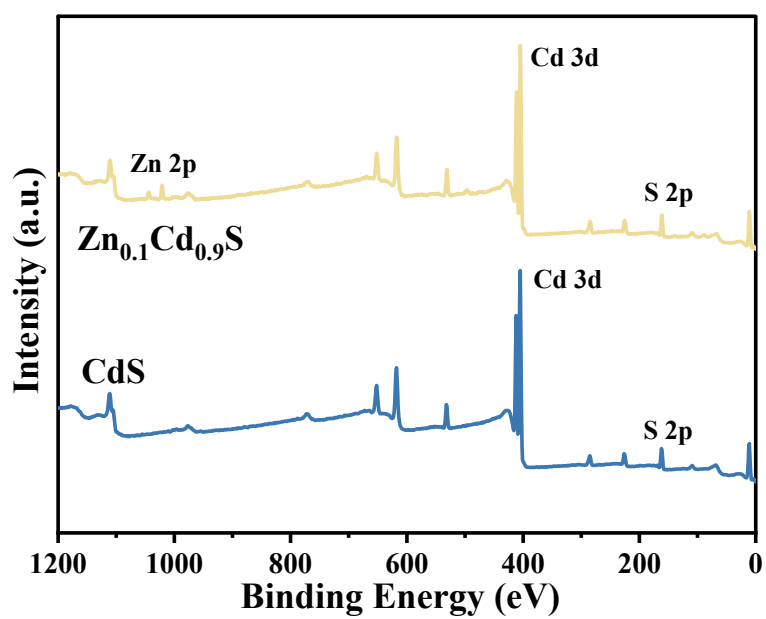

Fig. S3 XPS survey spectra of CdS and  $Zn_{0.1}Cd_{0.9}S$  thin films.

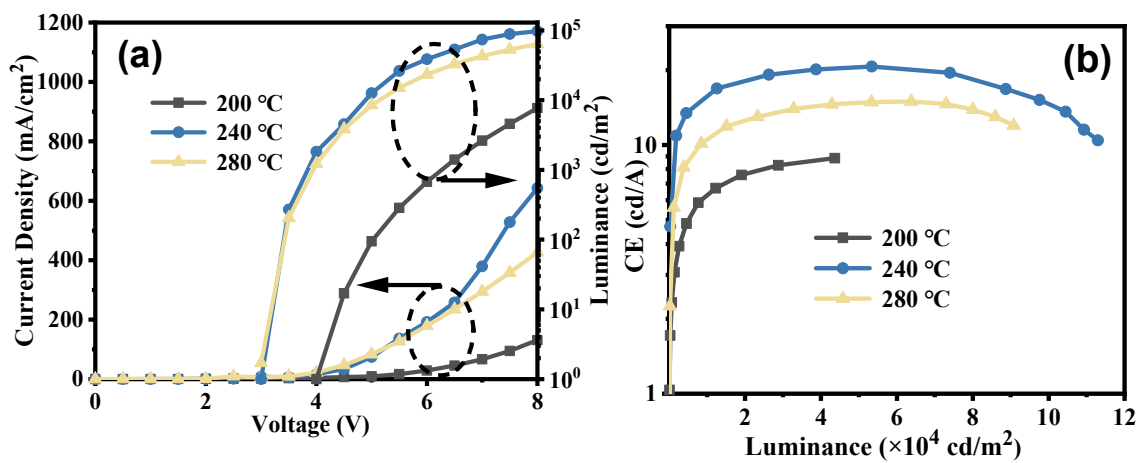

**Fig. S4** (a) *J-V-L* and (b) *CE-L* characteristics of Zn<sub>0.1</sub>Cd<sub>0.9</sub>S-based QLEDs annealed at different temperatures for 15 min.

**Table S2** The device parameters of Zn<sub>0.1</sub>Cd<sub>0.9</sub>S-based QLED devices annealed at different temperatures for 15 min.

| Annealing temperature<br>(°C) | V <sub>on</sub><br>(V) | L <sub>max</sub><br>(cd m <sup>-2</sup> ) | CE <sub>max</sub><br>(cd A <sup>-1</sup> ) |
|-------------------------------|------------------------|-------------------------------------------|--------------------------------------------|
| 200                           | 4                      | 43632                                     | 8.85                                       |
| 240                           | 3.0                    | 109577                                    | 20.67                                      |
| 280                           | 3.0                    | 90782                                     | 14.96                                      |

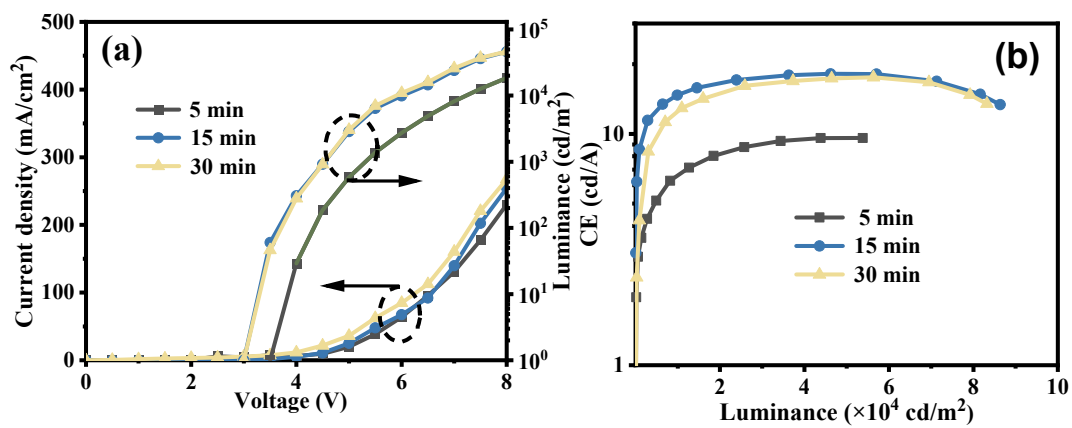

**Fig. S5** (a) *J-V-L* and (b) *CE-L* characteristics of Zn<sub>0.1</sub>Cd<sub>0.9</sub>S-based QLEDs annealed at 240°C for different annealing time.

**Table S3** The device parameters of Zn<sub>0.1</sub>Cd<sub>0.9</sub>S-based QLED devices annealed at 240°C for different annealing time.

| Annealing duration<br>(min) | V <sub>on</sub><br>(V) | L <sub>max</sub><br>(cd m <sup>-2</sup> ) | CE <sub>max</sub><br>(cd A <sup>-1</sup> ) |
|-----------------------------|------------------------|-------------------------------------------|--------------------------------------------|
| 5                           | 3.5                    | 53797                                     | 9.60                                       |
| 15                          | 3.0                    | 86335                                     | 18.17                                      |
| 30                          | 3.0                    | 83210                                     | 17.55                                      |

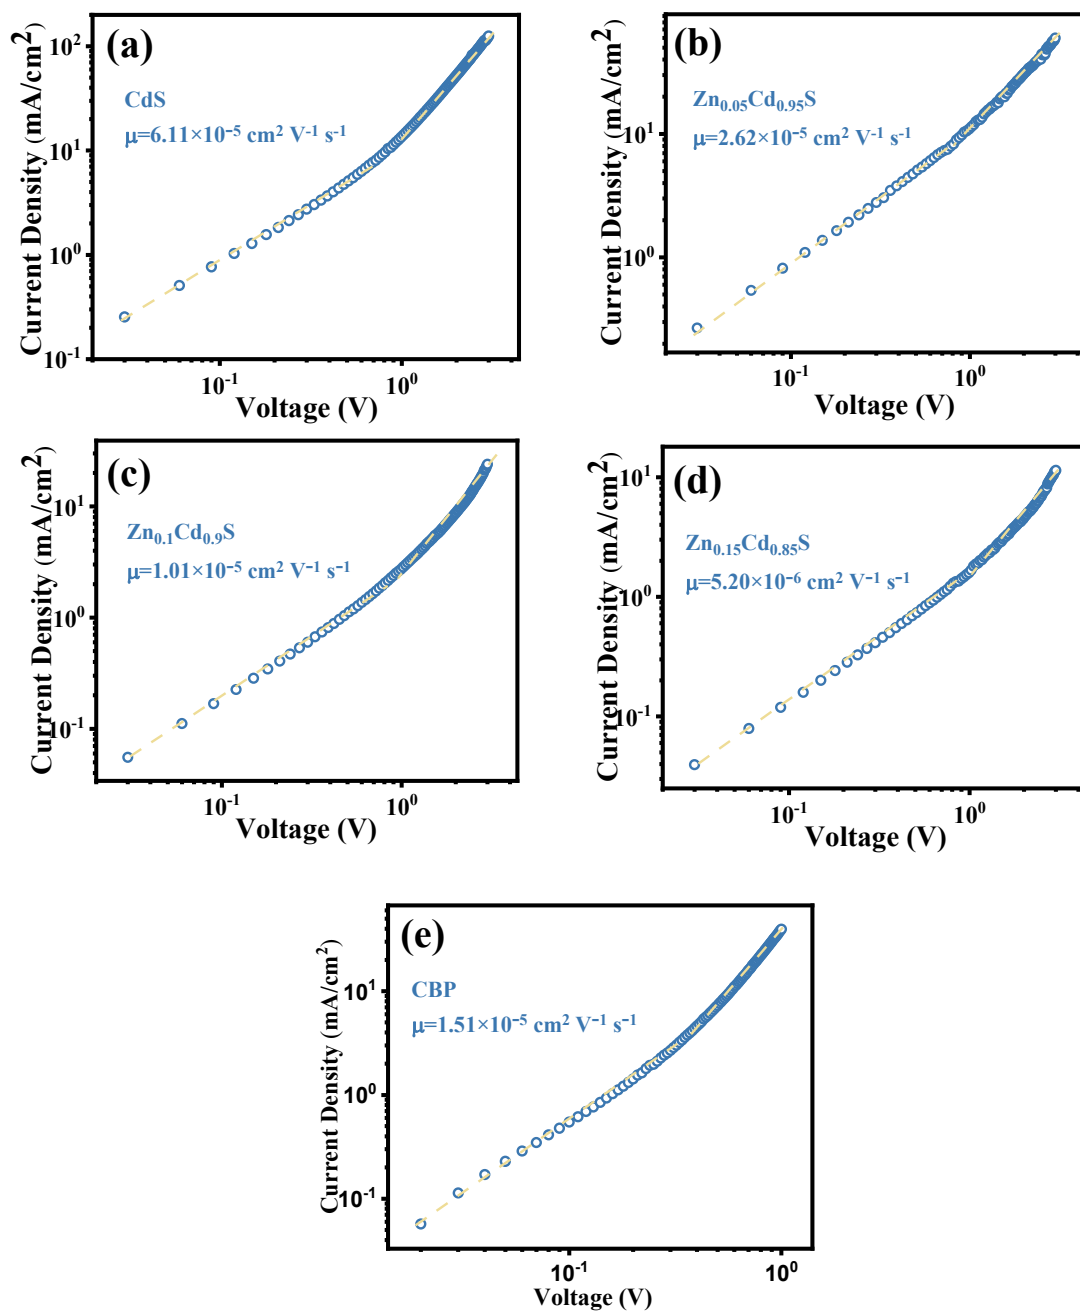

**Fig. S6**  $J$ - $V$  curves of (a-d) ITO/ $\text{Zn}_x\text{Cd}_{1-x}\text{S}$  ( $x = 0, 2.5, 5, 7.5, 10$ )/Al devices and (e) ITO/CBP/ $\text{MoO}_3$ /Al device for measuring mobility.

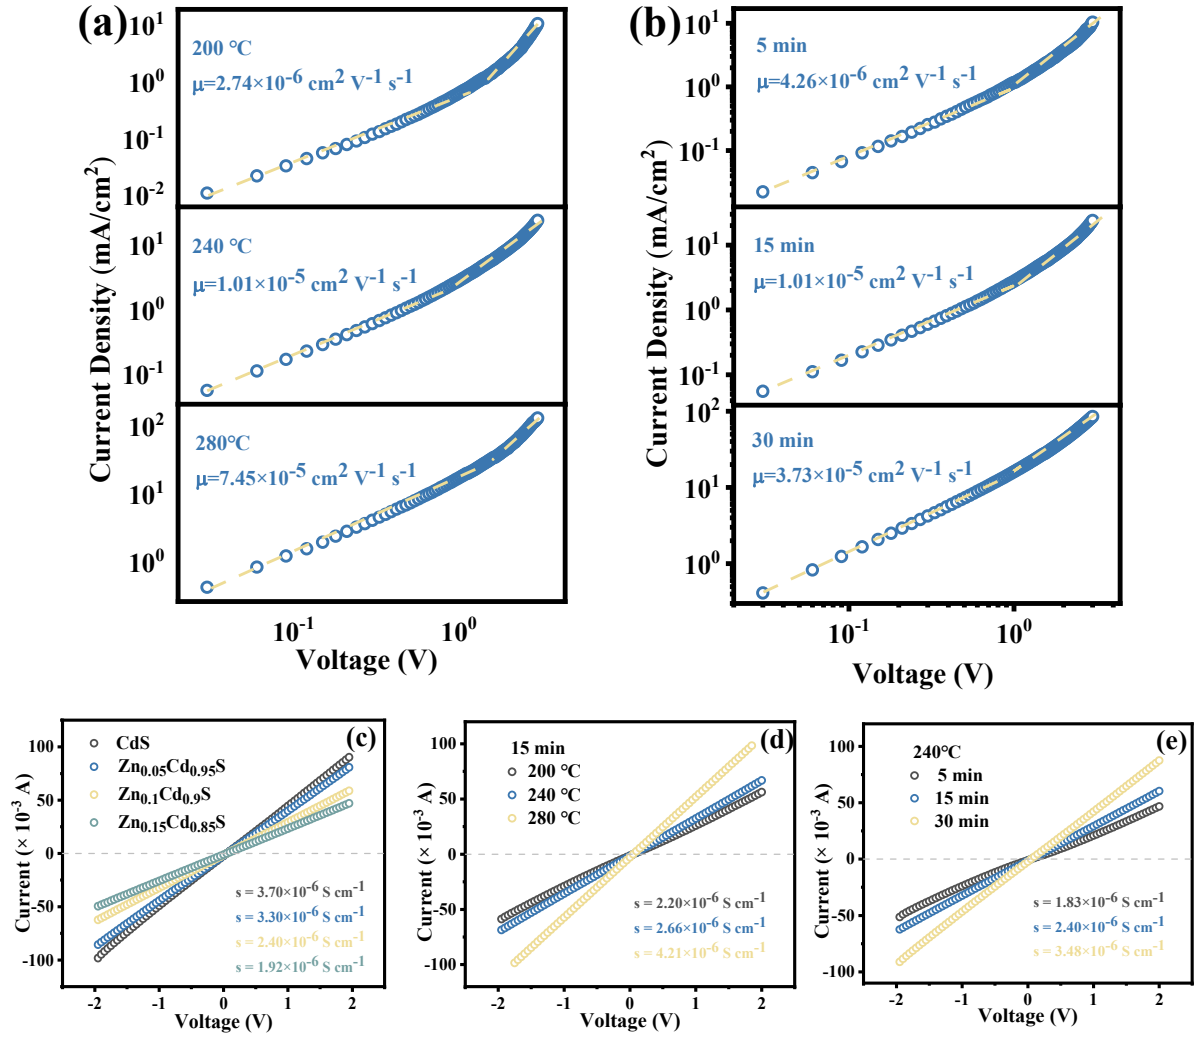

**Fig. S7** *J-V* curves of the devices of ITO/Zn<sub>0.1</sub>Cd<sub>0.9</sub>S/Al for measuring the mobility of Zn<sub>0.1</sub>Cd<sub>0.9</sub>S thin films with (a) different annealing temperatures for 15 min and (b) different annealing time at 240°C. (c) *I-V* curves of the devices of ITO/Zn<sub>x</sub>Cd<sub>1-x</sub>S/Al for measuring the conductivity of Zn<sub>x</sub>Cd<sub>1-x</sub>S thin films with different Zn/Cd ratios. *I-V* curves of the devices of ITO/Zn<sub>0.1</sub>Cd<sub>0.9</sub>S/Al for measuring the conductivity of Zn<sub>0.1</sub>Cd<sub>0.9</sub>S thin films with (d) different annealing temperatures for 15 min and (e) different annealing time at 240°C.

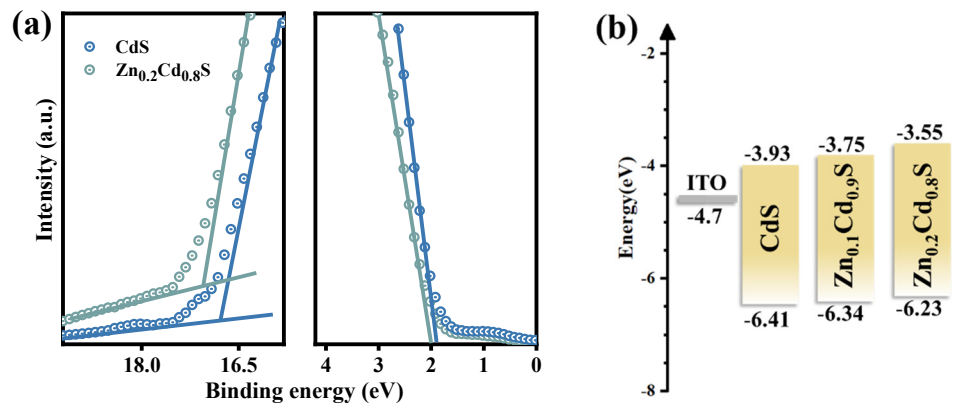

**Fig. S8** (a) UPS spectra and of CdS and Zn<sub>0.2</sub>Cd<sub>0.8</sub>S thin films. (b) Energy band diagrams of Zn<sub>x</sub>Cd<sub>1-x</sub>S films ( $x = 0, 0.1$  and  $0.2$ ).

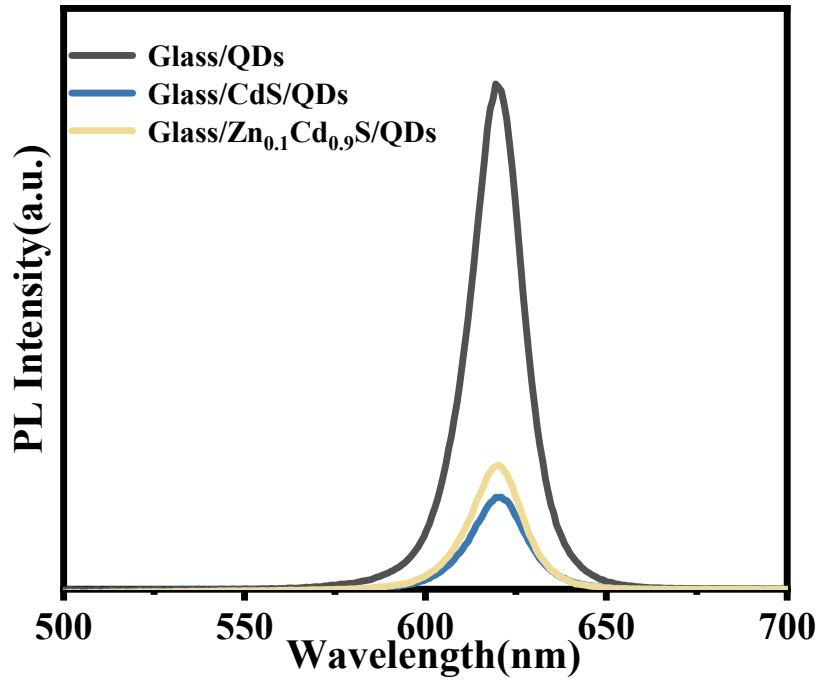

**Fig. S9** PL measurements of QDs on glass, CdS and Zn<sub>0.1</sub>Cd<sub>0.9</sub>S thin films.

## References:

1. D. Li, J. Ma, X. Qu, L. Jin, K. Wang and X. W. Sun, *Nanoscale*, **2026**, *18*, 2097-2105.
2. Y. Tian, Z. Y. Qin, S. J. Zou, Y. Q. Li, Y. Wang, W. Wang, C. Zhang and J. X. Tang, *Mater. Today Energy*, **2021**, *20*, 100649.
3. C. Lin, M. Liu, Y. Liu, X. Shi and D. Pan, *Dalton Trans.*, **2025**, *54*, 5511-5520.
4. B. Hu, M. Liu, X. Shi and D. Pan, *Dalton Trans.*, **2025**, *54*, 8174-8182.
